# Supplementary material
Source: PubMed Central journal article supplement (PMC2861045)
Supplement: NIHMS186533-supplement-Tables.pdf [file NIHMS186533-supplement-Tables.pdf]

Table S1. Multiple solutions for each residue of GB1 at the best RSDC determined alignment tensors. Two parameters are reported for each minimum, the RMSD between the experimental RDCs and the fitted one, and the angular deviation from the X-ray coordinates (1PGB).

| Residue | Solution 1 |                   | Solution 2 |                   |
|---------|------------|-------------------|------------|-------------------|
|         | RMSD       | Angular Deviation | RMSD       | Angular Deviation |
| 3       | 0.449      | 3.42              | 2.954      | 35.86             |
| 5       | 0.906      | 6.94              | 8.138      | 46.9              |
| 8       | 0.253      | 4.63              | 4.016      | 51.19             |
| 9       | 0.166      | 19.68             |            |                   |
| 10      | 0.295      | 7.38              |            |                   |
| 11      | 0.044      | 37.82             | 2.31       | 4.47              |
| 12      | 1.175      | 6.03              | 8.176      | 77.25             |
| 13      | 0.132      | 18.73             | 5.586      | 46.3              |
| 14      | 0.076      | 15.8              | 3.664      | 17.34             |
| 15      | 0.301      | 1.78              | 3.085      | 27.43             |
| 16      | 0.213      | 9.86              | 1.315      | 21.83             |
| 17      | 0.274      | 13.96             | 1.033      | 7.8               |
| 18      | 0.149      | 4.33              | 11.99      | 28.57             |
| 19      | 0.305      | 5.63              |            |                   |
| 21      | 0.137      | 14.41             | 2.51       | 82.83             |
| 24      | 0.06       | 10.31             | 8.319      | 44.54             |
| 26      | 0.197      | 4.09              | 11.606     | 88.66             |
| 28      | 0.037      | 11.53             |            |                   |
| 29      | 0.024      | 13.46             | 10.284     | 46.18             |
| 32      | 0.104      | 1.77              |            |                   |
| 34      | 0.499      | 2.04              | 9.171      | 72.04             |
| 35      | 0.066      | 5.1               | 5.152      | 33.85             |
| 36      | 0.288      | 19.15             |            |                   |
| 37      | 0.036      | 8.43              | 9.848      | 78.31             |
| 38      | 0.136      | 5.68              |            |                   |
| 39      | 0.325      | 15.53             | 6.761      | 59.45             |
| 40      | 0.531      | 18.07             | 1.658      | 18.54             |
| 41      | 0.383      | 19.02             | 5.208      | 45.92             |
| 43      | 0.219      | 14.98             | 8.369      | 74.31             |
| 44      | 0.365      | 2.13              | 5          | 39.86             |
| 46      | 0.113      | 1.66              | 1.461      | 22.07             |
| 48      | 0.483      | 14.65             | 10.297     | 72.53             |
| 49      | 0.052      | 29.05             | 1.197      | 14.71             |
| 50      | 0.635      | 4.49              | 1.85       | 31.04             |
| 51      | 0.281      | 4.94              | 0.779      | 10.27             |
| 52      | 0.003      | 10.05             | 21.128     | 49.34             |
| 53      | 0.713      | 2.59              | 6.666      | 63.72             |
| 54      | 0.309      | 1.94              | 6.852      | 61.85             |
| 56      | 0.568      | 8.37              | 8.937      | 46.78             |

Table S2. Multiple solutions for each residue of ubiquitin at the best RSDC determined alignment tensors. Two parameters are reported for each minimum, the RMSD between the experimental RDCs and the fitted one, and the angular deviation from the X-ray coordinates (IUBQ).

| Residue | Solution 1 |                   | Solution 2 |                   | Solution 3 |                   |
|---------|------------|-------------------|------------|-------------------|------------|-------------------|
|         | RMSD       | Angular Deviation | RMSD       | Angular Deviation | RMSD       | Angular Deviation |
| 2       | 0.253      | 2.86              |            |                   |            |                   |
| 3       | 0.02       | 3.44              | 0.1        | 86.58             | 1.72       | 65                |
| 4       | 0.067      | 3.64              | 1.838      | 62.26             |            |                   |
| 5       | 0.19       | 1.85              | 3.343      | 46.48             |            |                   |
| 6       | 0.17       | 11.21             |            |                   |            |                   |
| 7       | 0.063      | 5.14              | 2.478      | 58.13             |            |                   |
| 8       | 0.626      | 41.85             | 0.852      | 10.06             | 1.099      | 50.12             |
| 11      | 0.314      | 8.44              | 1.192      | 63.12             |            |                   |
| 12      | 0.69       | 13.63             | 1.193      | 42.47             |            |                   |
| 13      | 0.109      | 6.06              | 3.304      | 52.78             | 3.309      | 48.58             |
| 14      | 0.272      | 9.34              | 1.221      | 37.71             |            |                   |
| 15      | 0.442      | 2.79              | 0.958      | 88.7              |            |                   |
| 17      | 0.281      | 6.61              | 3.084      | 85.75             | 7.404      | 85.87             |
| 18      | 0.151      | 8.77              | 0.554      | 29.51             |            |                   |
| 20      | 0.294      | 4.8               | 3.781      | 79.06             | 6.905      | 47.13             |
| 21      | 0.008      | 5.43              | 0.886      | 60.16             | 2.302      | 64.85             |
| 23      | 0.018      | 3.52              |            |                   |            |                   |
| 25      | 0.04       | 64.09             | 0.176      | 1.44              |            |                   |
| 27      | 0.22       | 16.52             | 0.496      | 1.86              |            |                   |
| 28      | 0.196      | 28.83             | 0.304      | 58.81             | 0.482      | 2.67              |
| 29      | 0.141      | 4.48              | 0.589      | 24.91             | 0.964      | 49.47             |
| 30      | 0.014      | 0.15              |            |                   |            |                   |
| 32      | 0.108      | 17.98             | 0.142      | 57.06             | 0.233      | 10.06             |
| 33      | 0.394      | 12.82             | 0.977      | 30.06             | 1.024      | 13.24             |
| 34      | 0.056      | 17.79             | 0.314      | 8.43              | 0.62       | 38.79             |
| 35      | 0.26       | 4.45              | 3.371      | 48.79             | 8.602      | 66.21             |
| 36      | 0.154      | 11.53             |            |                   |            |                   |
| 40      | 0.228      | 4.1               | 4.095      | 74.79             | 7.763      | 69.34             |
| 41      | 0.014      | 6.42              | 0.817      | 17.07             |            |                   |
| 42      | 0.077      | 3.79              | 0.889      | 77.1              | 1.1        | 23.84             |
| 43      | 0.109      | 8.46              | 1.952      | 86.16             |            |                   |
| 44      | 0.174      | 2.98              | 0.312      | 14.99             |            |                   |
| 45      | 0.311      | 6.18              | 2.714      | 60.52             |            |                   |
| 47      | 0.219      | 8.23              |            |                   |            |                   |
| 48      | 0.047      | 11.05             | 3.007      | 65.96             |            |                   |
| 49      | 0.077      | 5.82              | 4.198      | 68.72             | 5.233      | 63.32             |
| 50      | 0.171      | 5.74              | 0.371      | 31.82             | 0.509      | 25.57             |
| 51      | 0.039      | 7.95              | 0.25       | 53.71             |            |                   |
| 52      | 0.456      | 19.18             | 1.706      | 14.72             |            |                   |
| 54      | 0.096      | 17.62             | 4.407      | 61.46             | 4.696      | 78.08             |
| 55      | 0.221      | 2.72              | 0.592      | 24.72             | 0.988      | 53.22             |
| 56      | 0.015      | 7.01              | 2.97       | 66.68             |            |                   |
| 58      | 0.042      | 3.88              | 0.56       | 89.14             | 1.54       | 55.68             |
| 59      | 0.053      | 11.39             | 3.681      | 84.4              |            |                   |
| 60      | 0.037      | 0.88              | 1.02       | 32.46             |            |                   |
| 61      | 0.017      | 7.52              | 1.679      | 29.87             |            |                   |
| 62      | 0.036      | 14.93             | 2.287      | 19.1              |            |                   |
| 63      | 0.379      | 4                 | 3.952      | 51.76             | 4.284      | 68.86             |
| 64      | 0.035      | 1.83              | 0.441      | 47.09             |            |                   |
| 65      | 0.205      | 2.44              |            |                   | 3.658      | 49.39             |
| 66      | 0.113      | 7.43              |            |                   |            |                   |
| 67      | 0.24       | 8.34              |            |                   |            |                   |
| 68      | 0.19       | 6.05              |            |                   |            |                   |
